# Supplementary material for: Puberty-specific promotion of mammary tumorigenesis by a high animal fat diet
Source: Springer Nature journal article supplement (doi:10.1186/s13058-015-0646-4), 2015-11-02
Supplement: MOESM1 [file 9781582]

Table S1. Diet Compositions

| Ingredients (g/100 g) |                                       | Low Fat Diet | High Fat Diet |
|-----------------------|---------------------------------------|--------------|---------------|
| Fat                   | Corn Oil                              | 2.369        | 16.1498       |
|                       | Lard                                  | 1.8957       | 31.6537       |
| Carbohydrate          | Corn Starch                           | 54.407       | 8.888         |
|                       | Maltodextrin                          | 11.848       | 16.1498       |
| Protein               | Casein                                | 18.987       | 25.8397       |
|                       | L-cystine                             | 0.2843       | 0.3876        |
| Fiber                 | Cellulose                             | 4.7393       | 6.4599        |
| Vitamins              | Vitamin Mix V10001                    | 0.9479       | 1.2919        |
|                       | Choline Bitartrate                    | 0.1896       | 0.2584        |
| Minerals              | Mineral Mix S10026                    | 0.9479       | 0.1286        |
|                       | DiCalcium Phosphate                   | 1.2322       | 1.6795        |
|                       | Calcium Carbonate                     | 0.5213       | 0.7106        |
|                       | Potassium Citrate, 1 H <sub>2</sub> O | 1.5639       | 2.1318        |
| <b>Energy</b>         |                                       |              |               |
| kcal density/g        |                                       | 3.8          | 5.2           |
| % kcal                | Fat                                   | 10           | 60            |
|                       | Carbohydrate                          | 70           | 20            |
|                       | Protein                               | 20           | 20            |
