# Supplementary material for: Puberty-specific promotion of mammary tumorigenesis by a high animal fat diet
Source: Springer Nature journal article supplement (doi:10.1186/s13058-015-0646-4), 2015-11-02
Supplement: MOESM2 [file 9781582]

**Table S2. Tumors used for quantitative reverse transcription PCR analysis and microarray analysis.**

|                            | <b>Latency (wks)*</b> | <b>Histopathology</b>       | <b>ER/PR</b> |
|----------------------------|-----------------------|-----------------------------|--------------|
| <b>LFD</b>                 | 31                    | Cribriform carcinoma        | ER-/PR-      |
|                            | 31                    | Papillary carcinoma         | ER+/PR+      |
|                            | 34                    | Adenosquamous carcinoma     | ER-/PR-      |
|                            | 39                    | Glandular carcinoma         | ER+/PR+      |
| <b>HFD<br/>(early)</b>     | 17                    | Ductal Carcinoma            | ER+/PR+      |
|                            | 14                    | Adenosquamous/Cribriform CA | ER-/PR-      |
|                            | 10                    | Adenosquamous carcinoma     | ER-/PR-      |
|                            | 10                    | Adenosquamous carcinoma     | ER-/PR-      |
| <b>HFD<br/>(late)</b>      | 29                    | Papillary carcinoma         | ER+/PR+      |
|                            | 34                    | Papillary carcinoma         | ER+/PR+      |
|                            | 35                    | Adenosquamous carcinoma     | ER-/PR-      |
|                            | 45                    | Glandular carcinoma         | ER+/PR+      |
| <b>LFD-HFD</b>             | 28                    | Papillary carcinoma         | ER-/PR-      |
|                            | 31                    | Glandular carcinoma         | ER+/PR+      |
|                            | 37                    | Glandular carcinoma         | ER+/PR+      |
|                            | 42                    | Glandular carcinoma         | ER+/PR+      |
| <b>HFD-LFD<br/>(early)</b> | 10                    | Adenosquamous carcinoma     | ER-/PR-      |
|                            | 16                    | Adenosquamous carcinoma     | ER-/PR-      |
|                            | 17                    | Adenosquamous carcinoma     | ER-/PR-      |
|                            | 19                    | Cribriform carcinoma        | ER-/PR-      |
| <b>HFD-LFD<br/>(late)</b>  | 26                    | Papillary carcinoma         | ER-/PR-      |
|                            | 33                    | Glandular carcinoma         | ER+/PR+      |
|                            | 38                    | Adenosquamous carcinoma     | ER-/PR-      |

\*Latency is presented as weeks post first DMBA treatment
