# Supplementary material for: Puberty-specific promotion of mammary tumorigenesis by a high animal fat diet
Source: Springer Nature journal article supplement (doi:10.1186/s13058-015-0646-4), 2015-11-02
Supplement: MOESM3 [file 9781582]

**Table S3 Ontology analysis of short-latency tumors that cluster together.**

**Upregulated Pathways**

| Canonical Pathway                                 | B-H Adjusted p-value | Ratio  | Molecules                                                                                  |
|---------------------------------------------------|----------------------|--------|--------------------------------------------------------------------------------------------|
| Cell Cycle: G1/S Checkpoint Regulation            | 6.10E-05             | 10/61  | TP53,RBL2,HDAC2,PA2G4,CUL1,GNL3,SKP1,CDK2,SKP2, ATM                                        |
| Cell Cycle: G2/M DNA Damage Checkpoint Regulation | 6.10E-05             | 9/49   | CDC25B,TP53,YWHAB,CUL1, TOP2A,SKP1,SKP2,CCNB1,ATM                                          |
| Cyclins and Cell Cycle Regulation                 | 2.01E-04             | 10/75  | TP53,CCNA2,HDAC2,PA2G4,CUL1,SKP1,CDK2,SKP2,CCNB1,ATM                                       |
| Antiproliferative Role of TOB in T Cell Signaling | 1.04E-02             | 5/26   | CCNA2,CUL1,SKP1,CDK2,SKP2                                                                  |
| GADD45 Signaling                                  | 2.36E-02             | 4/19   | TP53,CDK2,CCNB1,ATM                                                                        |
| DNA damage-induced 14-3-3 $\sigma$ Signaling      | 2.36E-02             | 4/19   | TP53,CDK2,CCNB1,ATM                                                                        |
| mTOR Signaling                                    | 3.18E-02             | 11/176 | EIF3F,EIF4G2,RHOT1,EIF4A3,EIF3I,RPS6KA3,RPS6KA5,EIF4A2,PRKD3, EIF4B,ATM                    |
| Purine Nucleotides De Novo Biosynthesis II        | 4.39E-02             | 3/11   | GMPS,PAICS,PPAT                                                                            |
| EIF2 Signaling                                    | 4.50E-02             | 10/161 | EIF3F,EIF4G2,RPL28,EIF4A3,EIF3I,EIF2B3,EIF4A2,AGO1,RPL13A,ATM                              |
| Cell Cycle Control of Chromosomal Replication     | 4.84E-02             | 4/26   | ORC2,ORC3,ORC5,CDK2                                                                        |
| Molecular Mechanisms of Cancer                    | 4.84E-02             | 16/354 | TP53,RALA,PA2G4,AXIN1,NCSTN,CRK,CDC25B,GAB1, RHOT1,CASP8,PRKD3,SMAD1,CDK2,PRKAR1A,ATM,FZD7 |

**Downregulated Pathways**

| Canonical Pathway              | B-H Adjusted p-value | Ratio  | Molecules                                                                                     |
|--------------------------------|----------------------|--------|-----------------------------------------------------------------------------------------------|
| FXR/RXR Activation             | 4.87E-07             | 16/114 | PPARG,APOA4,APOB,APOH,NR1H4,ABCC2,SERPINF2,APOA1,ABCB4, SLC51A,FGFR4,SERPINA1,FGA,GC,PON3,AGT |
| LXR/RXR Activation             | 4.66E-05             | 13/108 | RXRG,APOA1,APOB,APOA4,APOH,NR1H4,APOA5,SERPINA1,GC,FGA, PON3,SERPINF2,AGT                     |
| Coagulation System             | 4.66E-05             | 8/35   | F11,PLG,F12,SERPINC1,VWF,SERPINA1,FGA,SERPINF2                                                |
| Acute Phase Response Signaling | 3.35E-02             | 11/157 | PLG,ITIH3,APOA1,APOH,IL6R,VWF,SERPINA3,SERPINA1,FGA,SERPINF2, AGT                             |
