# Supplementary material for: Puberty-specific promotion of mammary tumorigenesis by a high animal fat diet
Source: Springer Nature journal article supplement (doi:10.1186/s13058-015-0646-4), 2015-11-02
Supplement: MOESM4 [file 9781582]

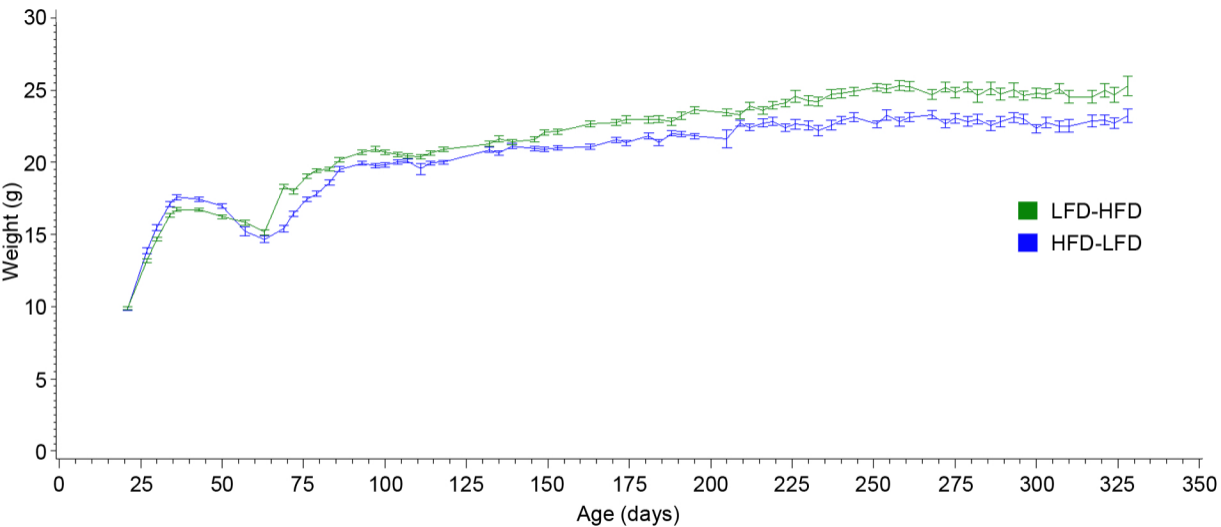

**Figure S1.** Effects of diets on body weight.
