# Supplementary material for: Puberty-specific promotion of mammary tumorigenesis by a high animal fat diet
Source: Springer Nature journal article supplement (doi:10.1186/s13058-015-0646-4), 2015-11-02
Supplement: MOESM5 [file 9781582]

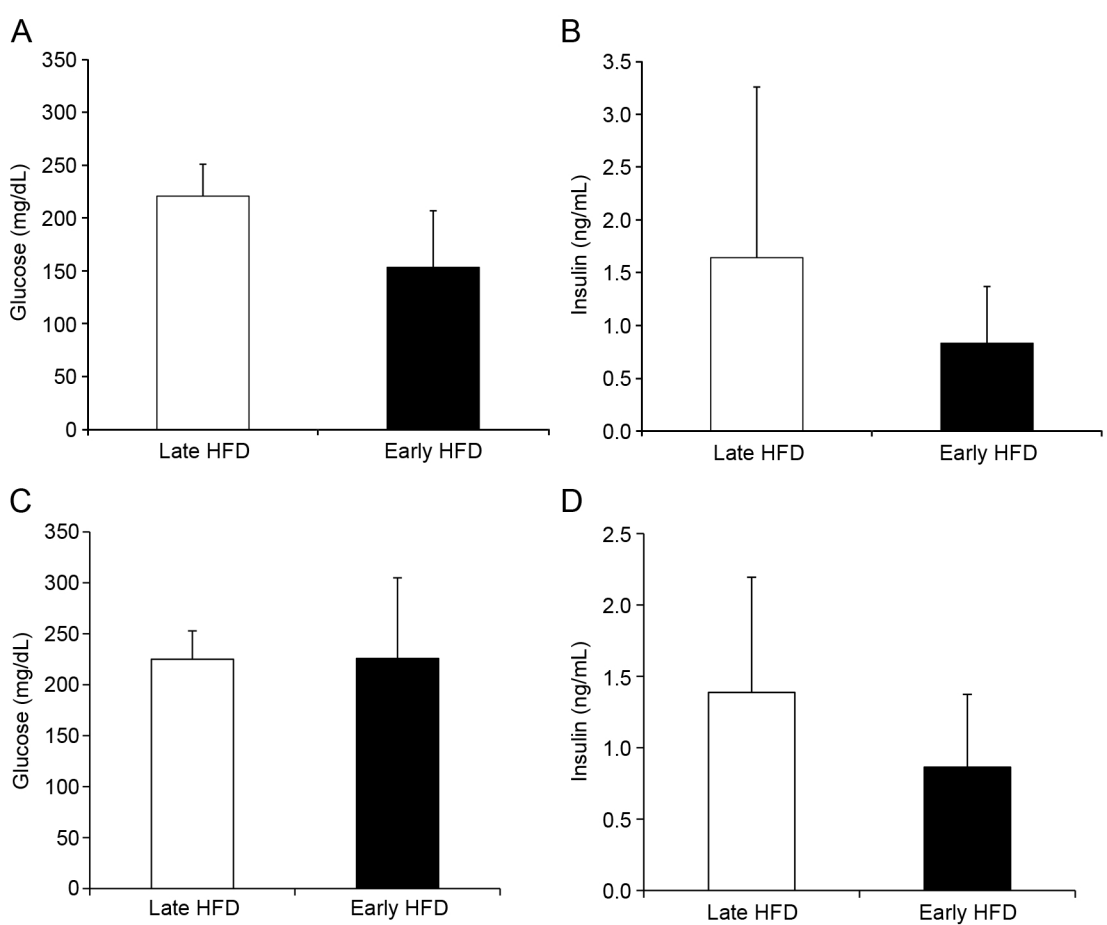

**Figure S2.** Effects of diet treatments on blood levels of glucose and insulin.
